# Supplementary material
Source: publisher site journal article supplement (https://www.dovepress.com/article/218063)
Supplement: Supplementary file 1 [file get_supplementary_file.php]

**Supplementary Data**

**Table S1. ICD-10 codes for hematological malignancy.**

| **Hematological malignancy** | C81-C96, D45, D46, D471, D473 |
| --- | --- |
| **Leukemia** | C91-C95 (except for C911, C913, C914, C916) |
| **Lymphoma** | C81-C85, C88, C911, C913, C914, C916, C96 |
| **Myeloma** | C90 |
| **Myelodysplastic syndrome** | D46 |
| **Myeloproliferative neoplasm** | D45, D471, D473 |

**Table S2. ICD-10 codes for cardiovascular diseases and psychiatric disorders.**

|  | **ICD-10** |
| --- | --- |
| **Cardiovascular diseases** | I00-I99 |
| - Hypertension | I10, I11, I12, I13, I14, I15 |
| - Myocardial infarction | I21, I22 |
| - Embolism or thrombosis | I26, I74, I81, I82 |
| - Heart failure | I50 |
| - Stroke | I60, I61, I62, I63, I64 |
| **Psychiatric disorders** | F10-F99 |
| - Stress reaction or adjustment disorder | F43 |
| - Depression | F32, F33 |
| - Anxiety | F40, F41 |

Table S3. The three most frequent discharge diagnoses during the three months before and three months after biopsy for biopsied individuals.

|  | **Bone marrow aspiration or biopsy** | **Lymph node biopsy** |
| --- | --- | --- |
| **1** | Anemia  (n=749, 36.5%) | Infection  (n=5356, 31.8%) |
| **2** | Medical observation and evaluation for suspected diseases and conditions  (n=481, 23.5%) | Medical observation and evaluation for suspected diseases and conditions  (n=4325, 25.7%) |
| **3** | Coagulation defects, purpura or other hemorrhagic conditions  (n=312, 15.2%) | Autoimmune diseases  (n=2319, 13.8%) |

Table S4. Incidence rates (IRs, per 1000 person-months) and incidence rate ratios (IRRs) of individual cardiovascular diseases and psychiatric disorders during diagnostic workup of patients with hematological malignancy and biopsied individuals, a population-based cohort study in Skåne, Sweden 2005-2014a

|  | Reference periodb | | | Patients with hematological malignancy | | | Biopsied individuals | | |
| --- | --- | --- | --- | --- | --- | --- | --- | --- | --- |
| No. of diagnoses | Crude IR | IRR (95% CI)c | No. of diagnoses | Crude IR | IRR (95% CI)c | No. of diagnoses | Crude IR | IRR (95% CI)c |
| Cardiovascular diseases |  |  |  |  |  |  |  |  |  |
| Hypertension | 49,401 | 0.4 | 1.0 | 16 | 2.8 | 2.5 (1.6-4.1) | 70 | 2.9 | 4.1 (3.2-5.2) |
| Myocardial infarction | 33,194 | 0.2 | 1.0 | 19 | 3.3 | 3.6 (2.2-5.8) | 26 | 1.1 | 2.2 (1.5-3.4) |
| Embolism or thrombosis | 18,623 | 0.1 | 1.0 | 19 | 3.3 | 8.1 (5.2-12.8) | 21 | 0.9 | 4.4 (4.2-5.2) |
| Stroke | 42,162 | 0.3 | 1.0 | 33 | 5.8 | 5.1 (3.6-7.4) | 550 | 23.2 | 37.5 (34.1-41.2) |
| Heart failure | 53,710 | 0.4 | 1.0 | 41 | 7.2 | 4.2 (3.1-5.8) | 43 | 1.8 | 2.0 (1.5-2.7) |
| Psychiatric disorder |  |  |  |  |  |  |  |  |  |
| Depression | 173,065 | 1.3 | 1.0 | 3 | 0.5 | 0.4 (0.1-1.7) | 184 | 7.8 | 3.5 (3.0-4.0) |
| Anxiety | 144,508 | 1.1 | 1.0 | 10 | 1.8 | 2.1 (1.0-4.4) | 84 | 3.6 | 2.2 (1.7-2.8) |
| Stress reaction or adjustment disorder | 85,822 | 0.6 | 1.0 | 13 | 2.3 | 4.4 (2.6-7.6) | 60 | 2.5 | 2.7 (2.1-3.5) |

a Diagnostic workup was defined as the time interval starting from 1 week before date of diagnosis until 1 week after diagnosis for patients with leukemia, myelodysplastic syndrome, and myeloproliferative neoplasm, from 3 weeks until 1 week after diagnosis for patients with myeloma, and from 5 weeks before until 1 week after diagnosis for patients with lymphoma. Diagnostic workup was defined as the time interval starting from 1 week before date of biopsy until 1 week after biopsy for biopsied individuals with a bone marrow aspiration or biopsy, and from 5 weeks before until 1 week after biopsy for biopsied individuals with a lymph node biopsy.

b Reference included person-time accumulated during the follow-up of individuals that were not identified as patients with hematological malignancy or biopsied individuals as well as person-time accumulated before the defined diagnostic workup from patients with hematological malignancy and biopsied individuals.

c Adjusted for attained age and calendar year, sex, civil status, preexisting cardiovascular disease or psychiatric disorder, and registered parish. CI, confidence interval.

**Table S5. Incidence rates (IRs, per 1000 person-months) and incidence rate ratios (IRRs) of cardiovascular diseases and psychiatric disorders during the diagnostic workup of patients with hematological malignancy and biopsied individuals, according to sex, age, calendar period, civil status, and preexisting cardiovascular disease or psychiatric disorder, a population-based cohort study in Skåne, Sweden 2005-2014a**

|  | Referenceb | | | Patients with hematological malignancy | | | | Biopsied individuals | | |
| --- | --- | --- | --- | --- | --- | --- | --- | --- | --- | --- |
| No. of diagnoses | Crude IR | IRR (95% CI)c | No. of diagnoses | Crude IR | | IRR (95% CI)c | No. of diagnoses | Crude IR | IRR (95% CI)c |
| Cardiovascular diseases | | | | | |  | | | | |
| Sex |  |  |  |  |  | |  |  |  |  |
| Male | 370,280 | 5.4 | 1.0 | 200 | 63.8 | | 3.4 (2.9-3.9) | 620 | 57.5 | 4.4 (4.1-4.9) |
| Female | 276,392 | 4.0 | 1.0 | 105 | 40.7 | | 3.3 (2.7-4.0) | 537 | 41.4 | 5.6 (5.1-6.2) |
| Age, years |  |  |  |  |  | |  |  |  |  |
| 0-20 | 11,242 | 0.3 | 1.0 | 1 | 7.9 | | 9.0 (1.1-76.5) | 23 | 7.3 | 12.3 (8.0-18.8) |
| 21-40 | 34,507 | 0.9 | 1.0 | 15 | 44.5 | | 30.6 (17.1-54.1) | 118 | 25.7 | 15.8 (12.7-19.5) |
| 41-60 | 144,155 | 4.1 | 1.0 | 45 | 41.3 | | 6.3 (4.6-8.7) | 340 | 59.6 | 9.5 (8.4-10.7) |
| 61-80 | 330,182 | 14.1 | 1.0 | 152 | 51.0 | | 2.9 (2.4-3.4) | 513 | 62.8 | 3.5 (3.2-3.8) |
| ≥81 | 126,586 | 22.4 | 1.0 | 92 | 77.9 | | 3.2 (2.5-4.0) | 163 | 76.4 | 3.2 (2.7-3.7) |
| Calendar period |  |  |  |  |  | |  |  |  |  |
| 2005-2009 | 306,275 | 4.5 | 1.0 | 134 | 49.1 | | 3.4 (2.8-4.0) | 518 | 53.5 | 5.9 (5.4-6.6) |
| 2010-2014 | 340,397 | 4.9 | 1.0 | 171 | 57.4 | | 3.3 (2.8-3.9) | 639 | 45.5 | 4.3 (4.0-4.7) |
| Civil status |  |  |  |  |  | |  |  |  |  |
| Cohabitating | 332,685 | 7.1 | 1.0 | 173 | 56.5 | | 3.4 (2.9-4.0) | 552 | 52.3 | 4.2 (3.8-4.6) |
| Non-cohabitating | 313,987 | 3.5 | 1.0 | 132 | 49.8 | | 3.3 (2.7-4.0) | 605 | 45.6 | 5.9 (5.4-6.4) |
| Preexisting cardiovascular diseases | | | |  |  | |  |  |  |  |
| Yes | 504,061 | 37.2 | 1.0 | 181 | 100.3 | | 2.4 (2.0-2.8) | 585 | 109.7 | 2.9 (2.6-3.2) |
| No | 142,611 | 1.1 | 1.0 | 316 | 31.7 | | 9.0 (7.5-10.7) | 572 | 31.1 | 14.8 (13.8-15.8) |
| Psychiatric disorders | | | | | |  | | | | |
| Sex |  |  |  |  |  | |  |  |  |  |
| Male | 473,383 | 6.9 | 1.0 | 35 | 11.2 | | 2.5 (1.5-3.9) | 337 | 31.5 | 3.5 (3.1-4.0) |
| Female | 510,885 | 7.4 | 1.0 | 24 | 9.3 | | 1.7 (1.1-2.5) | 411 | 32.0 | 2.9 (2.6-3.2) |
| Age, years |  |  |  |  |  | |  |  |  |  |
| 0-20 | 267,518 | 7.5 | 1.0 | 1 | 7.9 | | 1.2 (0.2-8.6) | 109 | 35.0 | 3.4. (2.8-4.1) |
| 21-40 | 318,063 | 8.5 | 1.0 | 6 | 17.8 | | 2.4 (1.1-5.0) | 134 | 29.6 | 2.2 (1.8-2.7) |
| 41-60 | 291,123 | 8.3 | 1.0 | 19 | 17.6 | | 2.0 (1.3-3.1) | 225 | 40.0 | 3.0 (2.5-3.4) |
| 61-80 | 96,966 | 4.2 | 1.0 | 30 | 10.1 | | 2.7 (1.6-4.6) | 229 | 28.1 | 4.1 (3.5-4.7) |
| ≥81 | 10,598 | 1.9 | 1.0 | 3 | 2.5 | | 1.5 (0.4-6.3) | 51 | 23.9 | 6.6 (4.7-9.1) |
| Calendar period |  |  |  |  |  | |  |  |  |  |
| 2005-2009 | 467,584 | 6.9 | 1.0 | 25 | 9.2 | | 1.9 (1.3-2.8) | 304 | 31.6 | 3.1 (2.7-3.5) |
| 2010-2014 | 516,684 | 7.4 | 1.0 | 34 | 11.4 | | 2.2 (1.4-3.6) | 444 | 31.9 | 3.2 (2.9-3.6) |
| Civil status |  |  |  |  |  | |  |  |  |  |
| Cohabitating | 184,495 | 3.9 | 1.0 | 17 | 5.6 | | 2.0 (1.2-3.4) | 236 | 22.5 | 3.6 (3.1-4.1) |
| Non-cohabitating | 799,773 | 8.8 | 1.0 | 42 | 15.9 | | 2.1 (1.4-3.2) | 512 | 39.2 | 3.0 (2.7-3.3) |
| Preexisting psychiatric disorders | | | |  |  | |  |  |  |  |
| Yes | 849,490 | 63.1 | 1.0 | 39 | 93.2 | | 1.5 (1.0-2.4) | 539 | 143.7 | 2.4 (2.2-2.6) |
| No | 134,478 | 1.1 | 1.0 | 20 | 3.8 | | 5.9 (3.8-5.2) | 209 | 10.6 | 12.3 (10.7-14.1) |

a Diagnostic workup was defined as the time interval starting from 1 week before date of diagnosis until 1 week after diagnosis for patients with leukemia, myelodysplastic syndrome, and myeloproliferative neoplasm, from 3 weeks until 1 week after diagnosis for patients with myeloma, and from 5 weeks before until 1 week after diagnosis for patients with lymphoma. Diagnostic workup was defined as the time interval starting from 1 week before date of biopsy until 1 week after biopsy for biopsied individuals with a bone marrow aspiration or biopsy, and from 5 weeks before until 1 week after biopsy for biopsied individuals with a lymph node biopsy.

b Reference included person-time accumulated during the follow-up of individuals that were not identified as patients with hematological malignancy or biopsied individuals as well as person-time accumulated before the defined diagnostic workup from patients with hematological malignancy and biopsied individuals.

c Adjusted for attained age and calendar year, sex, civil status, preexisting cardiovascular disease or psychiatric disorder, and registered parish. CI, confidence interval.

**Table S6. Incidence rates (IRs, per 1000 person-months) and incidence rate ratios (IRRs) of cardiovascular diseases and psychiatric disorders during the diagnostic workup among patients with hematological malignancy and biopsied individuals, with further adjustment for frequency of healthcare visits, a population-based cohort study in Skåne, Sweden 2005-2014a**

|  | | Diagnostic workup | | |
| --- | --- | --- | --- | --- |
|  | **No. of**  **diagnoses** | | **Crude IR** | **IRR (95% CI)**c |
| Cardiovascular diseases |  | |  |  |
| Referenceb | 646,672 | | 4.7 | 1.0 |
| Patients with hematological malignancy | 305 | | 53.4 | 2.7 (2.3-3.0) |
| Biopsied individuals | 1,157 | | 48.7 | 3.8 (3.6-4.1) |
| Psychiatric disorder |  | |  |  |
| Referenceb | 984,268 | | 7.2 | 1.0 |
| Patients with hematological malignancy | 59 | | 10.4 | 1.8 (1.3-2.5) |
| Biopsied individuals | 748 | | 31.8 | 2.7 (2.5-2.9) |

a Diagnostic workup was defined as the time interval starting from 1 week before date of diagnosis until 1 week after diagnosis for patients with leukemia, myelodysplastic syndrome, and myeloproliferative neoplasm, from 3 weeks before until 1 week after diagnosis for patients with myeloma, and from 5 weeks before until 1 week after diagnosis for patients with lymphoma. Diagnostic workup was defined as the time interval starting from 1 week before date of biopsy until 1 week after biopsy for biopsied individuals with a bone marrow aspiration or biopsy, and from 5 weeks before until 1 week after biopsy for biopsied individuals with a lymph node biopsy.

b Reference included person-time accumulated during the follow-up of individuals that were not identified as patients with hematological malignancy or biopsied individuals as well as person-time accumulated before the defined diagnostic workup from patients with hematological malignancy and biopsied individuals.

c Adjusted for attained age and calendar year, sex, civil status, preexisting cardiovascular disease or psychiatric disorder, registered parish, and frequency of healthcare visits. CI, confidence interval.

**Table S7. Incidence rates (IRs, per 1000 person-months) and incidence rate ratios (IRRs) of cardiovascular diseases and psychiatric disorders during the diagnostic workup among biopsied individuals, compared with patients with hematological malignancy, a population-based cohort study in Skåne, Sweden 2005-2014a**

|  | | Diagnostic workup | | |
| --- | --- | --- | --- | --- |
|  | **No. of**  **diagnoses** | | **Crude IR** | **IRR (95% CI)**b |
| Cardiovascular diseases |  | |  |  |
| Patients with hematological malignancy | 305 | | 53.4 | 1.0 |
| Biopsied individuals | 1,157 | | 48.7 | 1.1 (1.0-1.2) |
| Psychiatric disorder |  | |  |  |
| Patients with hematological malignancy | 59 | | 10.4 | 1.0 |
| Biopsied individuals | 748 | | 31.8 | 1.4 (1.2-1.7) |

a Diagnostic workup was defined as the time interval starting from 1 week before date of diagnosis until 1 week after diagnosis for patients with leukemia, myelodysplastic syndrome, and myeloproliferative neoplasm, from 3 weeks before until 1 week after diagnosis for patients with myeloma, and from 5 weeks before until 1 week after diagnosis for patients with lymphoma. Diagnostic workup was defined as the time interval starting from 1 week before date of biopsy until 1 week after biopsy for biopsied individuals with a bone marrow aspiration or biopsy, and from 5 weeks before until 1 week after biopsy for biopsied individuals with a lymph node biopsy.

b Adjusted for attained age and calendar year, sex, civil status, preexisting cardiovascular disease or psychiatric disorder, and registered parish. CI, confidence interval.

**Figure S1. Flow chart.**

1,527,449 individuals residing during 2005-2014 in Skåne, Sweden

54,245 with prevalent cancer before entry to cohort

1,473,204 included in the final cohort

5,495 individuals with a newly diagnosed hematological malignancy during follow-up

18,906 individuals with a bone marrow aspiration or biopsy or lymph node biopsy during follow-up

1.448,803 individuals not identified as patients with hematological malignancy or biopsied individuals

**Figure S2. Weekly frequency of healthcare visits before and after the date of diagnosis for patients with hematological malignancy, a population-based cohort study in Skåne, Sweden 2005-2014.**

**Note:** Red arrow represents the week from which the weekly number of healthcare visits increased statistically significantly compared to the week before.

**
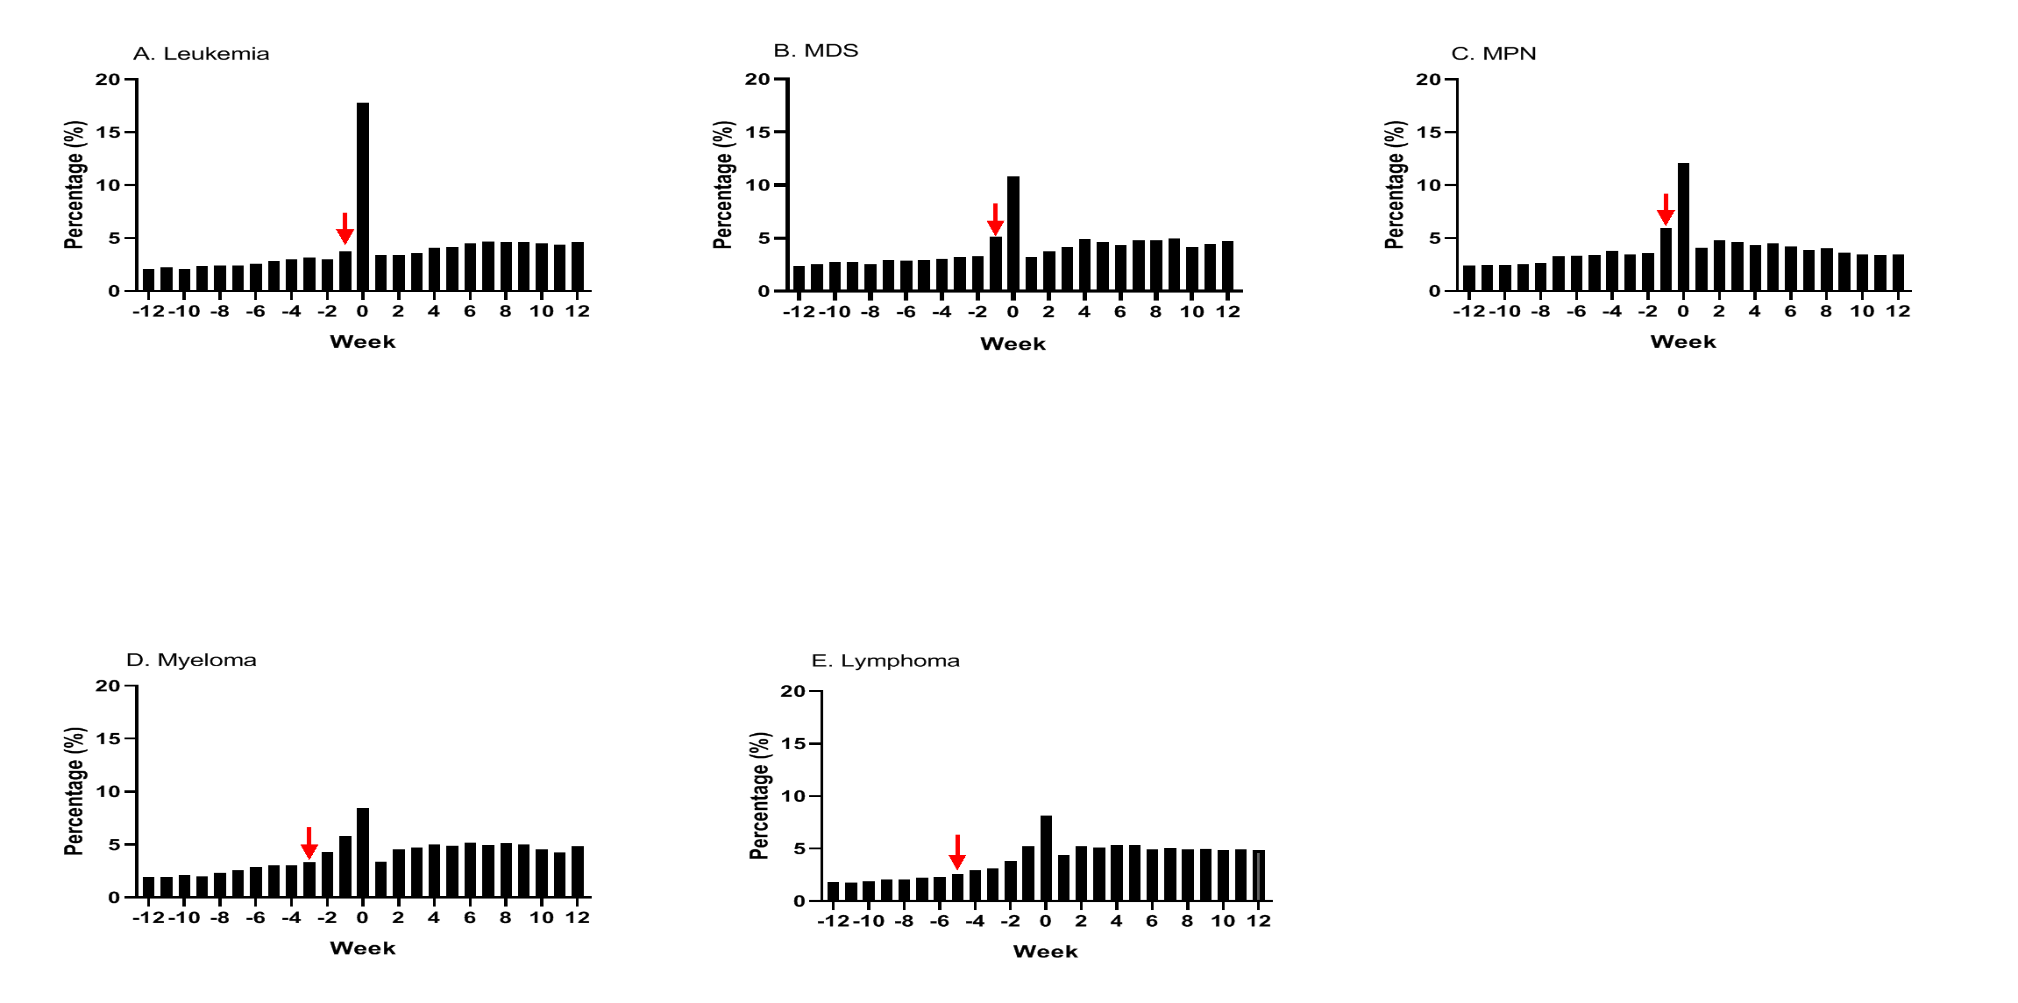
**
